# Supplementary material for: Brief communication: Reanalyses underperform in cold regions, raising concerns for climate services and research
Source: Copernicus journal article supplement (doi:10.5194/egusphere-2025-575), 2025-02-27
Supplement: Supplementary file 1 [file egusphere-2025-575-supplement.pdf]

# Supporting Information for "Reanalyses underperform in cold regions, raising concerns for climate services and research"

Bin Cao<sup>1</sup>, and Stephan Gruber<sup>2</sup>

<sup>1</sup>Key Laboratory of Tibetan Plateau Earth System, Environment and Resources (TPESER), National Tibetan Plateau Data

Center, Institute of Tibetan Plateau Research, Chinese Academy of Sciences, Beijing, China

<sup>2</sup>Department of Geography and Environmental Studies, Carleton University, Ottawa, Ontario, Canada

## Contents of this file

1. Figures S1

---

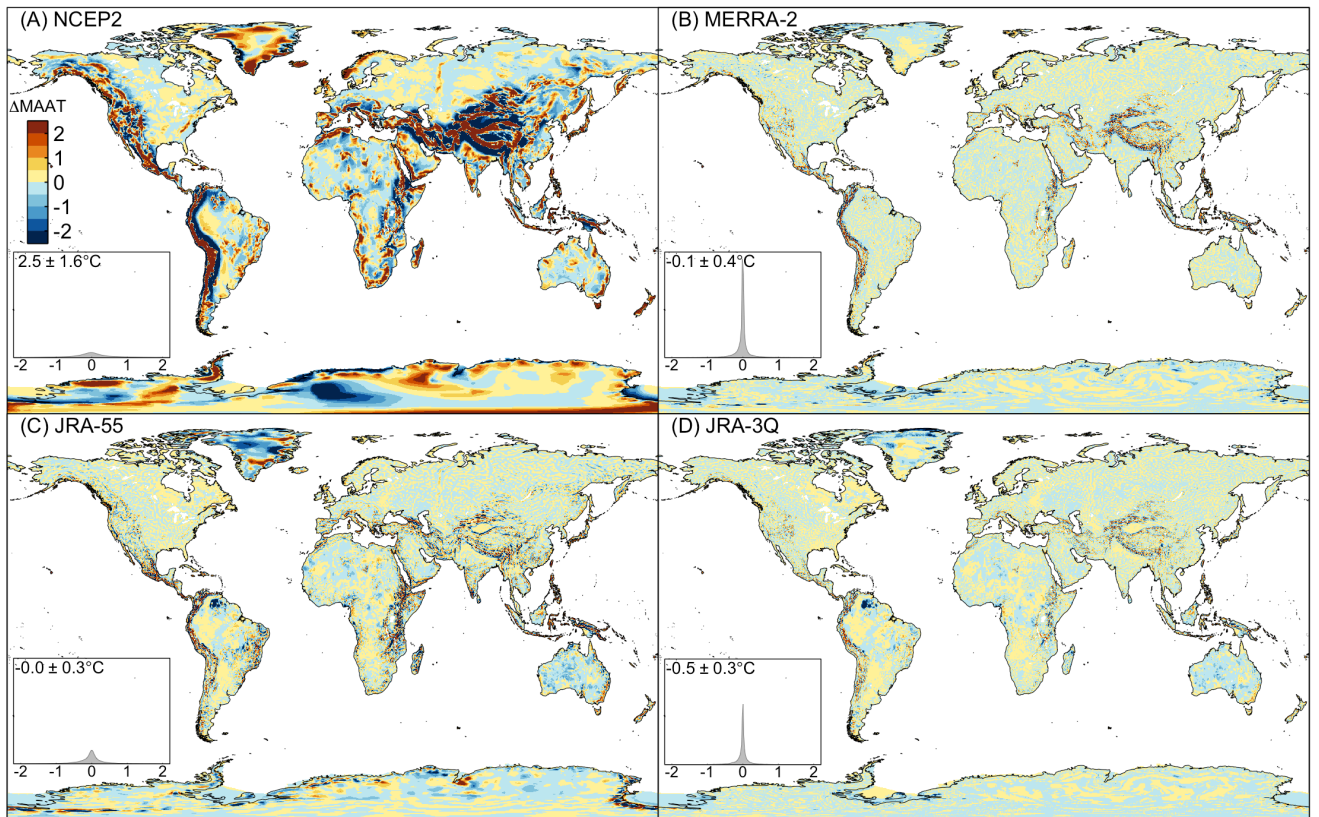

**Figure S1.** The MAAT difference ( $\Delta\text{MAAT}$ ) between 3D downscaling considering variable lapse rate (see Methods) and 2D linear interpolation. As an example, the MAAT in 2000 is shown. Insets show the distribution of differences with mean and standard deviation.
